# Supplementary material for: Analysis of Human Papilloma Virus Content and Integration in Mucoepidermoid Carcinoma
Source: MDPI journal article supplement (doi:10.3390/v14112353), 2022-10-26
Supplement: s1 [file s1]

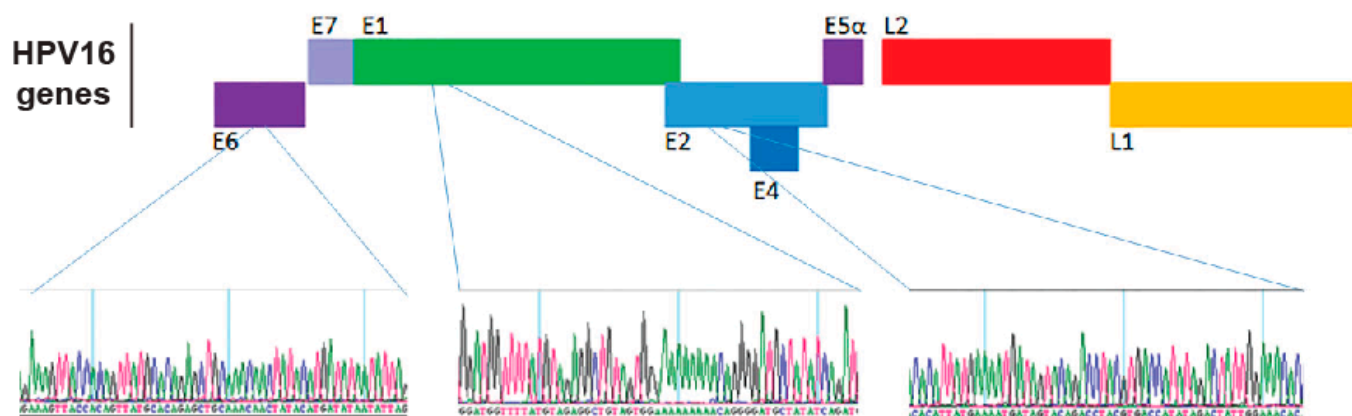

**Figure S1. HPV16 PCR and Sanger sequencing analysis.** We independently isolated genomic DNA from the FFPE block for MEC1 and performed PCR and Sanger sequencing on three independent regions of the HPV16 genome. Representative fragments of the Sanger traces validating the presence of HPV16 DNA are shown.

**Supplemental Table S1. Validation of HPV DNA in tumor MEC1.** Relative HPV16 read counts identified by mapping targeted capture DNA sequencing data to a HPV16 reference for the MEC samples that underwent targeted DNA analysis.

| MEC_ID | HPV_type | count_of_reads |
|--------|----------|----------------|
| MEC001 | HPV16    | 1034           |
| MEC003 | -        | 0              |
| MEC006 | -        | 0              |
| MEC007 | -        | 0              |
| MEC008 | -        | 0              |
| MEC009 | -        | 0              |
| MEC010 | -        | 0              |
| MEC011 | -        | 0              |
| MEC012 | -        | 0              |
| MEC013 | -        | 0              |
| MEC015 | -        | 0              |
| MEC016 | -        | 0              |
| MEC017 | -        | 0              |
| MEC018 | -        | 0              |
| MEC019 | -        | 0              |
| MEC020 | -        | 0              |
| MEC021 | -        | 0              |
| MEC022 | -        | 0              |
| MEC023 | -        | 0              |
| MEC024 | -        | 0              |

|        |       |   |
|--------|-------|---|
| MEC025 | -     | 0 |
| MEC027 | -     | 0 |
| MEC028 | -     | 0 |
| MEC033 | -     | 0 |
| MEC035 | -     | 0 |
| MEC036 | -     | 0 |
| MEC038 | -     | 0 |
| MEC039 | -     | 0 |
| MEC040 | -     | 0 |
| MEC041 | -     | 0 |
| MEC045 | -     | 0 |
| MEC046 | -     | 0 |
| MEC079 | HPV16 | 3 |
| MEC084 | -     | 0 |
| MEC087 | -     | 0 |
| MEC089 | -     | 0 |
| MEC096 | HPV16 | 2 |
| MEC098 | -     | 0 |
| MEC114 | HPV16 | 3 |
| MEC117 | -     | 0 |
| MEC121 | -     | 0 |
| MEC123 | -     | 0 |
| MEC136 | -     | 0 |
| MEC160 | -     | 0 |
| MEC167 | -     | 0 |
| MEC170 | -     | 0 |
| MEC173 | HPV16 | 4 |

**Supplemental Table S2. Total mapped reads and mapped rates for MEC1 and MEC23.**

| Sample | Total Reads | % Mapped | % Uniquely mapped |
|--------|-------------|----------|-------------------|
| MEC001 | 5520841     | 99.15    | 87.23             |
| MEC023 | 13382425    | 99.94    | 94.58             |

**Supplemental Table S3. List of targeted sequencing-derived HPV to host integration sites detected in MEC1 using SearchHPV.**

| Num | Pos            | SP | PE | Conf | HPVPos | HumGene      | HPVGene    |
|-----|----------------|----|----|------|--------|--------------|------------|
| 1   | chr1:211823777 | 1  | 5  | low  | 3308   | RP11-354K1.1 | Intergenic |
| 2   | chr10:15505686 | 2  | 4  | low  | 85     | Intergenic   | E1         |
| 3   | chr10:69656519 | 1  | 7  | low  | 1254   | SIRT1        | E1         |
| 4   | chr10:98436051 | 3  | 3  | high | 3094   | PIK3AP1      | E5_ALPHA   |

|    |                |   |   |      |      |              |          |
|----|----------------|---|---|------|------|--------------|----------|
| 5  | chr13:53617505 | 2 | 4 | low  | 76   | OLFM4        | E1       |
| 6  | chr14:28489344 | 2 | 4 | low  | 4865 | Intergenic   | L1       |
| 7  | chr17:14276448 | 4 | 4 | high | 76   | Intergenic   | E1       |
| 8  | chr19:16564680 | 6 | 6 | high | 1252 | EPS15L1      | E1       |
| 9  | chr2:135457871 | 4 | 5 | high | 1241 | TMEM163      | E1       |
| 10 | chr20:22781842 | 2 | 4 | low  | 85   | Intergenic   | E1       |
| 11 | chr21:39093507 | 2 | 4 | low  | 7510 | KCNJ6        | E6       |
| 12 | chr3:82745849  | 2 | 4 | low  | 345  | Intergenic   | E1       |
| 13 | chr4:121898294 | 2 | 4 | low  | 1293 | Intergenic   | E1       |
| 14 | chr4:157323326 | 3 | 6 | high | 3087 | Intergenic   | E5_ALPHA |
| 15 | chr4:36141816  | 6 | 6 | high | 6518 | ARAP2        | URR      |
| 16 | chr5:15126295  | 3 | 5 | high | 93   | Intergenic   | E1       |
| 17 | chr5:6550306   | 2 | 4 | low  | 7308 | Intergenic   | E6       |
| 18 | chr5:87613860  | 5 | 5 | high | 812  | TMEM161B-AS1 | E1       |
| 19 | chr6:131191962 | 2 | 4 | low  | 1254 | EPB41L2      | E1       |
| 20 | chr7:75277666  | 2 | 4 | low  | 3864 | HIP1         | L2       |
| 21 | chr8:56142436  | 2 | 4 | low  | 76   | XKR4         | E1       |
| 22 | chrX:138890126 | 2 | 4 | low  | 76   | ATP11C       | E1       |
